# Supplementary material for: Organic ammonium chloride salt incorporated SnO2electron transport layers for improving the performance of perovskite solar cells
Source: Royal Society of Chemistry journal article supplement (doi:10.1039/d2se00314g), 2022-01-01
Supplement: d2se00314g1.pdf [file d2se00314g1.pdf]

**Supplementary Information: Organic ammonium chloride salt  
incorporated tin oxide electron transport layer for improving  
performance of perovskite solar cells**

Zhigang Che, Limeng Zhang, Jiacheng Shang, Qi Wang, Yurong Zhou\*, Yuqin Zhou,  
Fengzhen Liu\*

Center of Materials Science and Opto-Electronics Engineering, College of Materials  
Science and Opto-Electronic Technology, University of Chinese Academy of  
Sciences, Beijing 100049, China

\*E-mail: zhouyurong@ucas.edu.cn, liufz@ucas.ac.cn

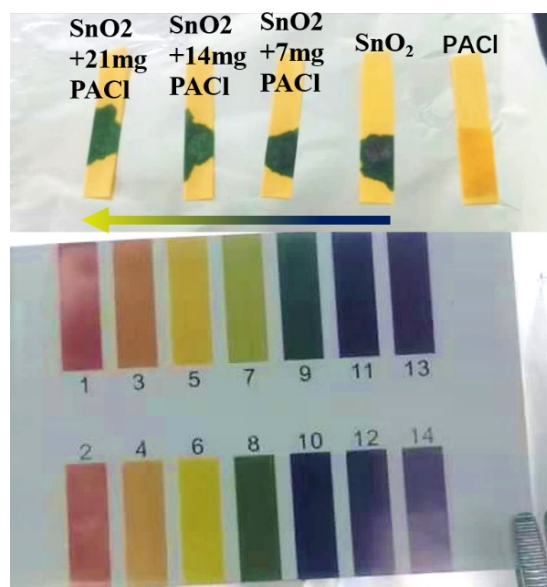

**Figure S1** PH text of SnO<sub>2</sub> colloid solution, PACl solution, and SnO<sub>2</sub> colloid solution added with PACl °

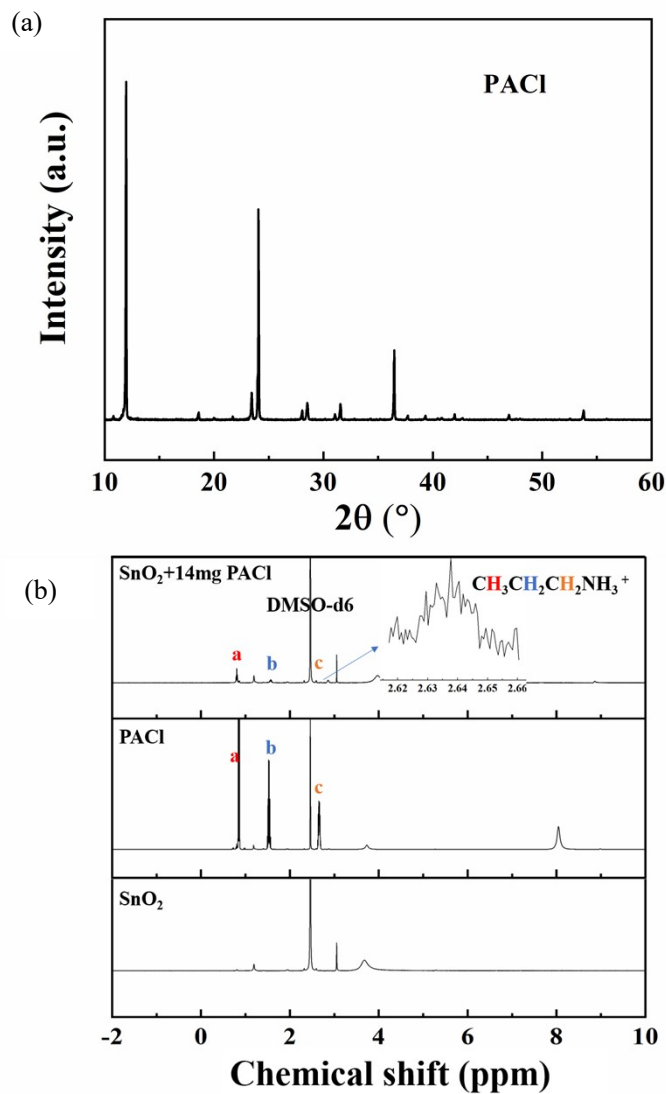

**Figure S2** (a) XRD pattern of PACl powder. (b) <sup>1</sup>H NMR spectra of SnO<sub>2</sub> powder, PACl powder, and PACl incorporated SnO<sub>2</sub> powder, dissolved in DMSO-d<sub>6</sub>. The resonances at about 0.9, 1.5, and 2.6 ppm, marked as a, b, and c, are corresponding to -CH<sub>3</sub>, -CH<sub>2</sub>-, and -CH<sub>2</sub>- in PA, respectively. The weak yet distinct resonance PA signals detected in the NMR spectrum of the PACl incorporated SnO<sub>2</sub> sample indicate the existence of PA in the SnO<sub>2</sub> colloid solution.

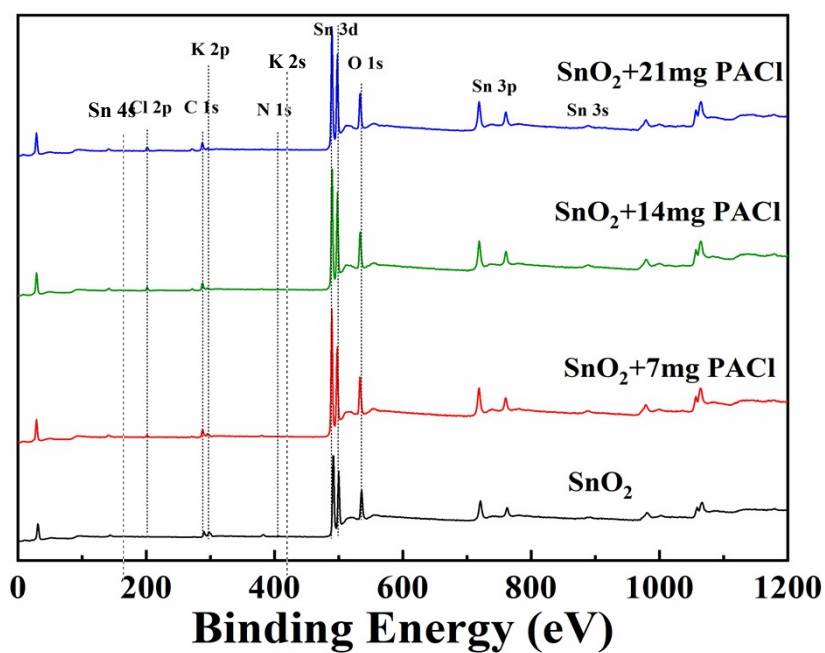

**Figure S3** XPS wide scan spectra of SnO<sub>2</sub> films with 0 mg, 7 mg, 14 mg and 21 mg PACl addition on Si substrates.

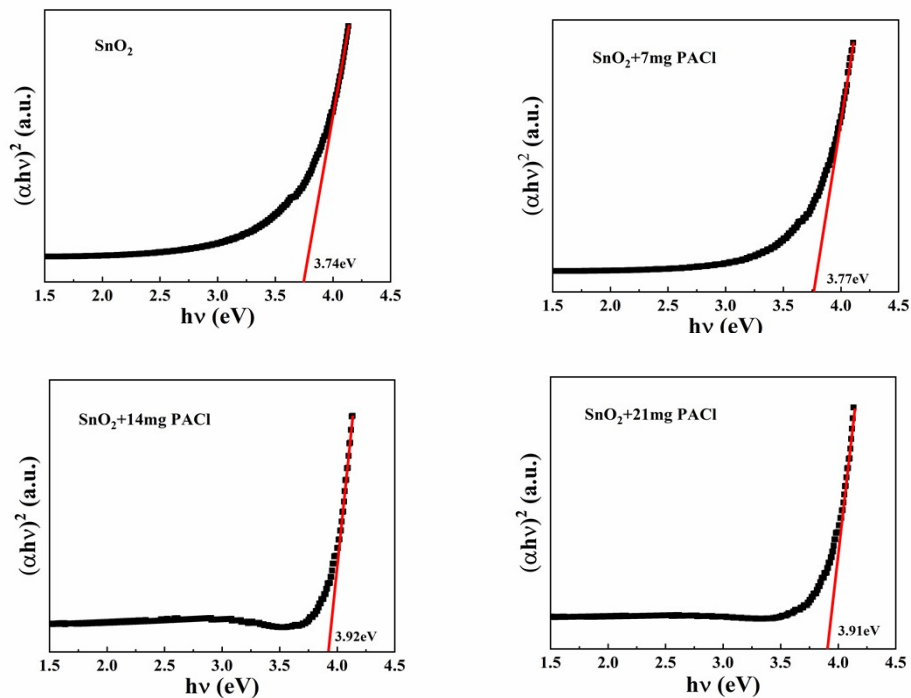

**Figure S4** Tauc plots derived from of the absorption spectra for the SnO<sub>2</sub> films with 0 mg, 7 mg, 14 mg and 21 mg PACl addition. The corresponding optical band gaps for SnO<sub>2</sub>, SnO<sub>2</sub>-7PACl, SnO<sub>2</sub>-14PACl and SnO<sub>2</sub>-21PACl films are 3.74 eV, 3.77 eV, 3.92 eV and 3.91 eV, respectively.

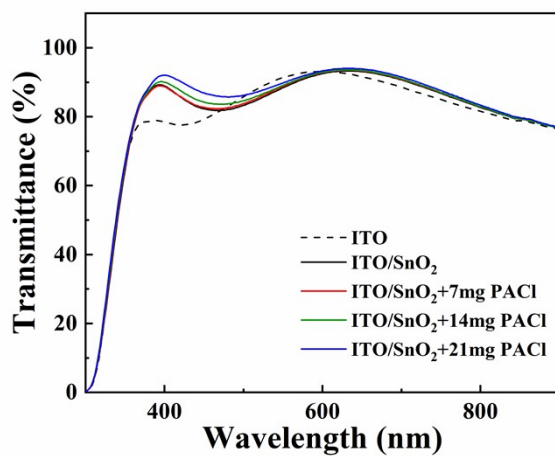

**Figure S5** Transmittance spectra of the SnO<sub>2</sub> films with 0 mg, 7 mg, 14 mg and 21 mg PACl addition. Transmittance in the wavelength range of 380-600 nm is much improved by the PACl incorporation for the SnO<sub>2</sub>-14PACl and SnO<sub>2</sub>-21PACl samples compared with the pristine SnO<sub>2</sub> sample. The transmittance spectrum of a ITO substrate is included.

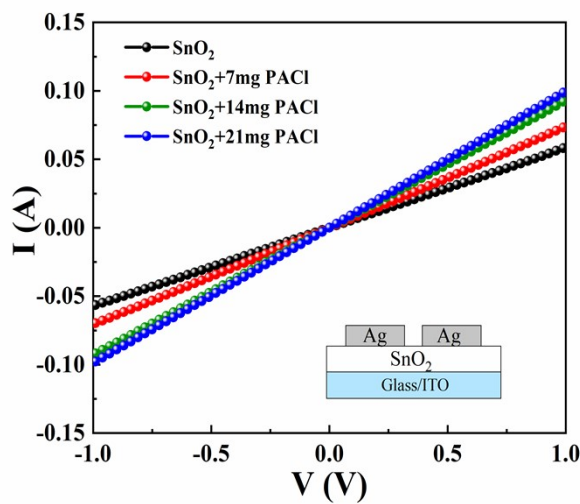

**Figure S6** I-V characteristics of samples with different ETL structures. The slope of the I-V curves increase with the increasing of the PACl concentration, which indicates improved electrical conductivity of the SnO<sub>2</sub> films by the PACl incorporation.

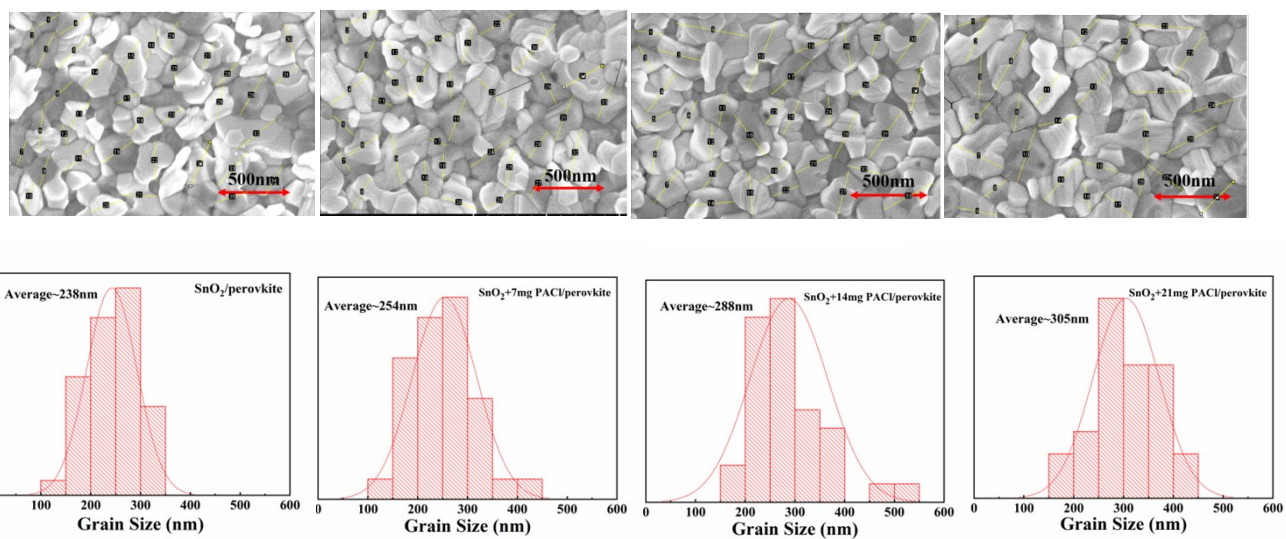

**Figure S7** Grain size distributions of perovskite films based on  $\text{SnO}_2$ ,  $\text{SnO}_2$ -7PACl,  $\text{SnO}_2$ -14PACl,  $\text{SnO}_2$ -21PACl films.

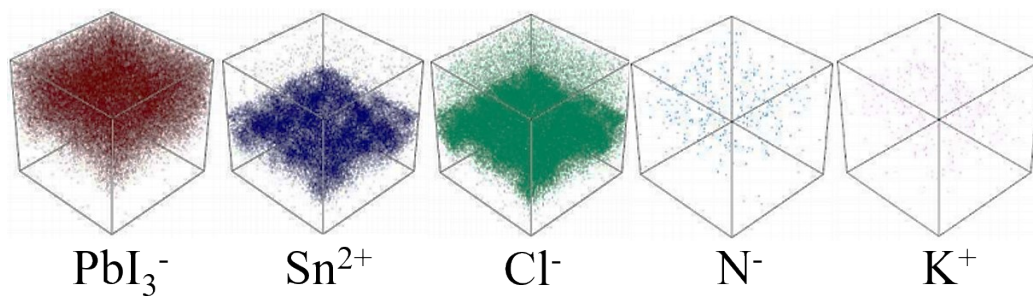

**Figure S8** The 3D depth profiles of ToF-SIMS data.

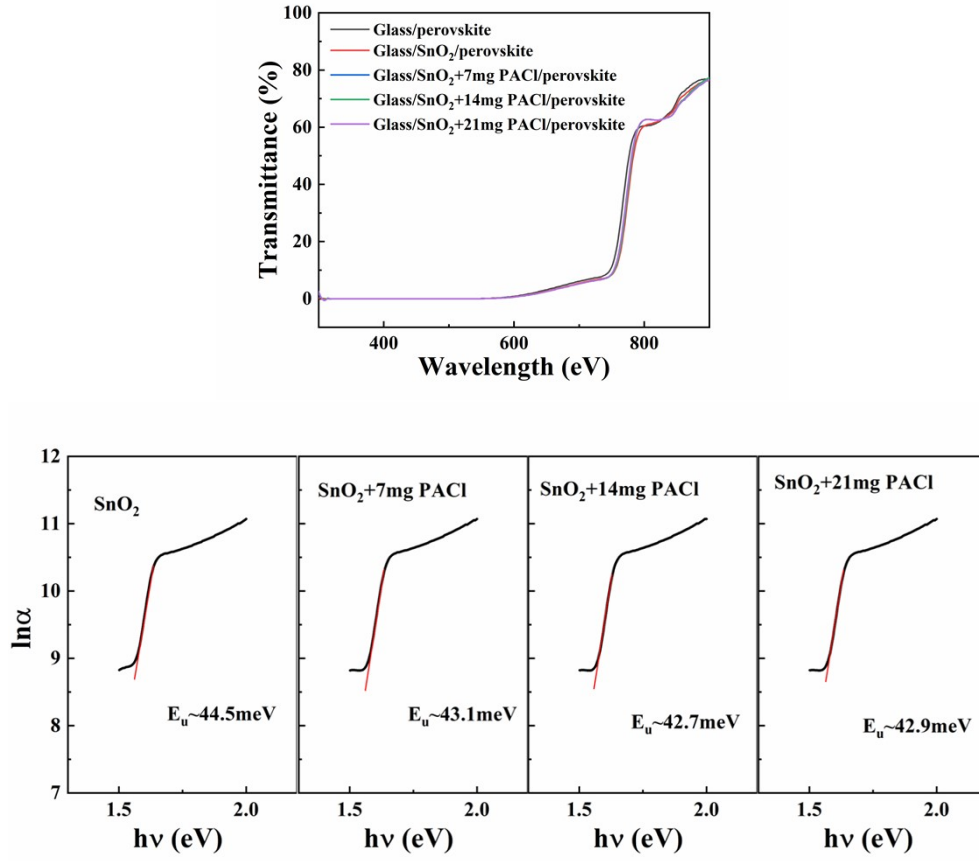

**Figure S9** Transmittance spectra and  $\ln \alpha$  versus  $h\nu$  plots of the perovskite films growth on SnO<sub>2</sub>, SnO<sub>2</sub>-7PACl, SnO<sub>2</sub>-14PACl, and SnO<sub>2</sub>-21PACl films. According to Urbach law given by  $\alpha = \alpha_0 \exp(h\nu/E_u)$ , the Urbach energy ( $E_u$ ) is estimated from the slop of  $\ln \alpha$  versus  $h\nu$  plots using the logarithmic form of  $\ln \alpha = \ln \alpha_0 + h\nu/E_u$ .

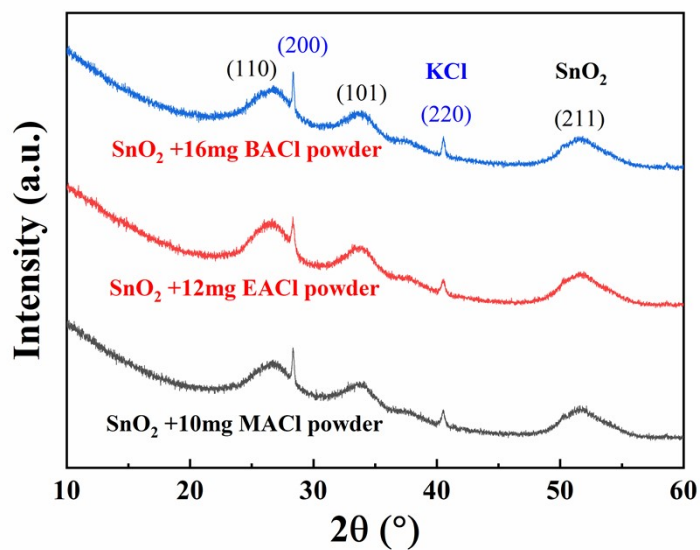

**Figure S10** XRD patterns of the freeze-dried  $\text{SnO}_2$  powder incorporated with MACl ( $\text{CH}_3\text{NH}_3\text{Cl}$ ,  $n=1$ ), EACl ( $\text{CH}_3\text{CH}_2\text{NH}_3\text{Cl}$ ,  $n=2$ ) and BACl ( $\text{CH}_3\text{CH}_2\text{CH}_2\text{CH}_2\text{NH}_3\text{Cl}$ ,  $n=4$ ) in the colloid solution. KCl peaks appear in the XRD patterns of all the samples.

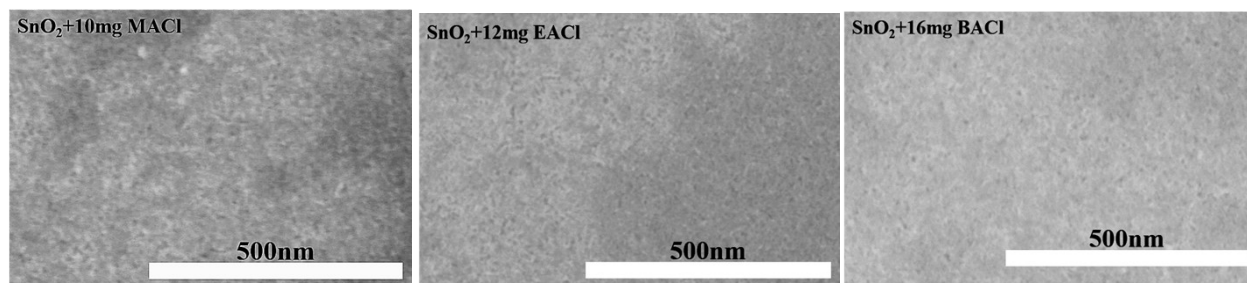

**Figure S11** SEM images of the  $\text{SnO}_2$  films incorporated with MACl, EACl and BACl. The KCl particles appear on the surfaces of the  $\text{SnO}_2$  films.

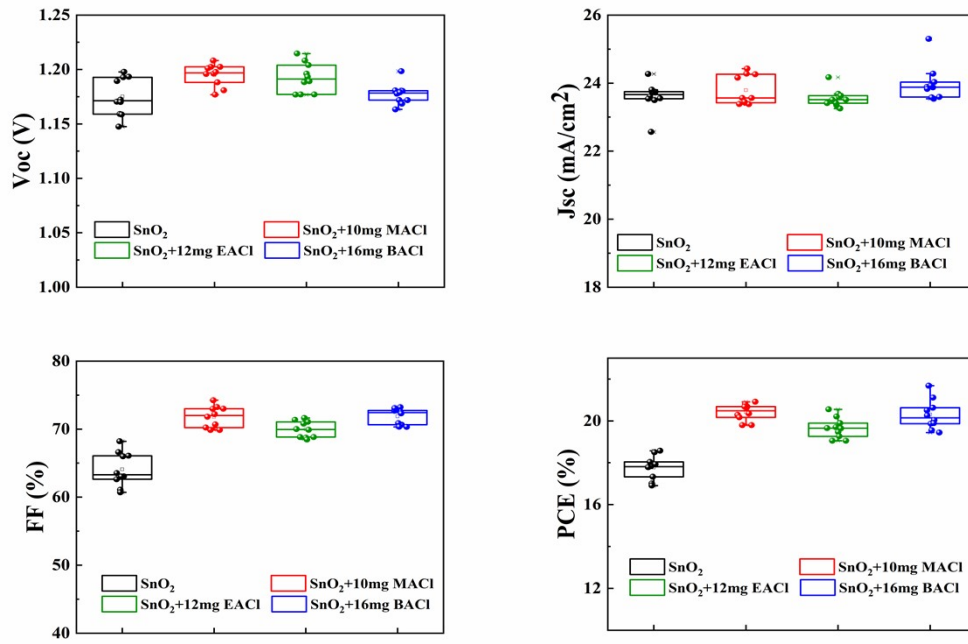

**Figure S12** PV parameters of the PSCs based on  $SnO_2$ ,  $SnO_2$ -10MACl,  $SnO_2$ -12EACl, and  $SnO_2$ -16BACl ETLs, respectively. Improvement of the device performances can be realized on all the PSCs based on primary alkylammonium chloride organic salts incorporated  $SnO_2$  ETLs with the most significant improvement in FF, which is consistent with the results of PACl condition.

**TABLE 1** The fitting results of IS.

| ETL             | $R\ (\Omega\ cm^{-2})$ | $R_1\ (\Omega\ cm^{-2})$ | $R_2\ (\Omega\ cm^{-2})$ |
|-----------------|------------------------|--------------------------|--------------------------|
| $SnO_2$         | 6.5                    | $2.6 \times 10^5$        | 8615                     |
| $SnO_2$ -7PACl  | 5.7                    | $1.1 \times 10^4$        | $1.6 \times 10^5$        |
| $SnO_2$ -14PACl | 8.0                    | 2689                     | $1.83 \times 10^5$       |
| $SnO_2$ -21PACl | 6.3                    | 2286                     | $1.92 \times 10^5$       |
